# Supplementary material for: Calpain-1: a Novel Antiviral Host Factor Identified in Porcine Small Intestinal Mucus
Source: PubMed Central journal article supplement (PMC9600339; doi:10.1128/mbio.00358-22), 2022-09-14

**Fig. 3L**

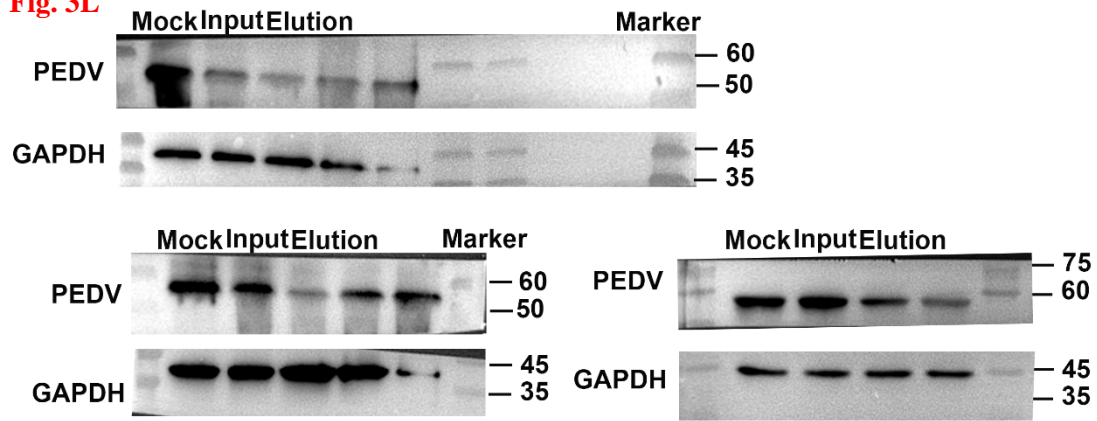

**Fig. 5C**

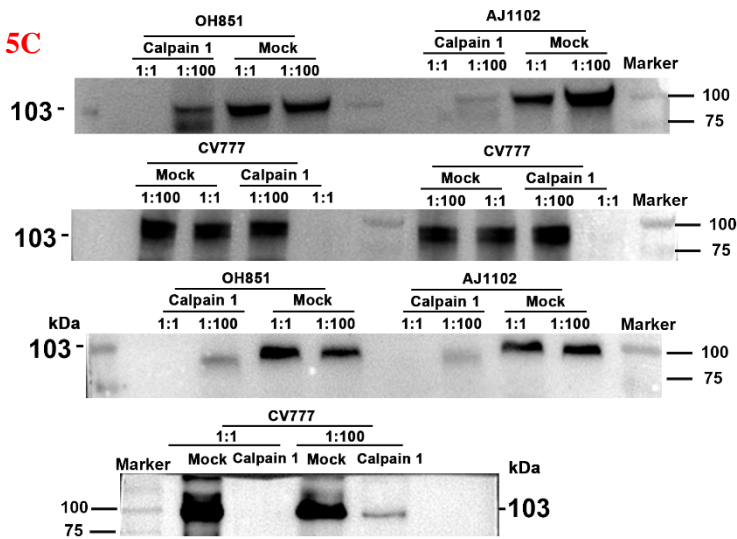

**Fig. 5D**

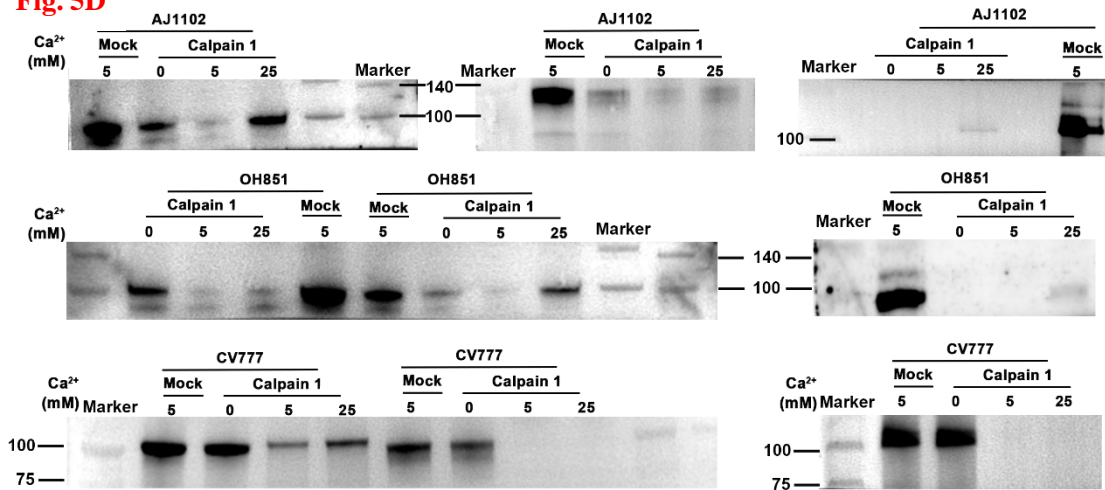

**Fig. 5E**

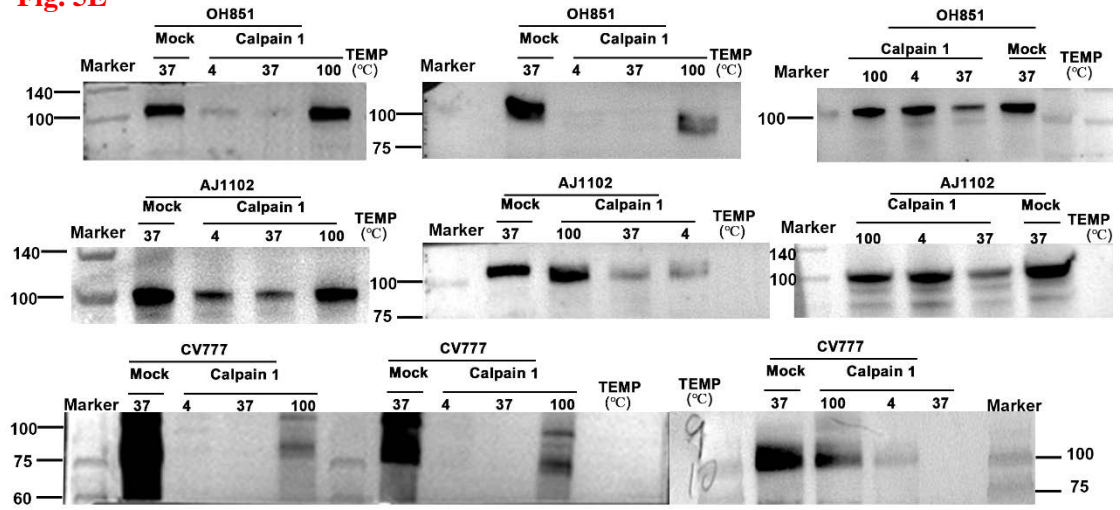

**Fig. 5H**

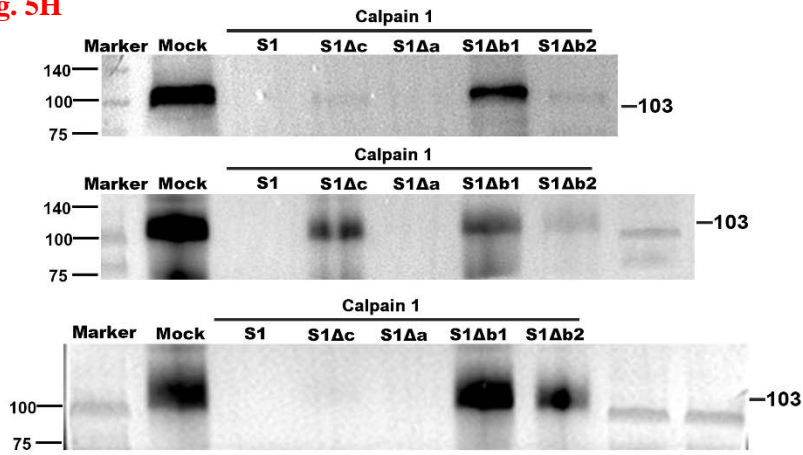

**Fig. 5I**

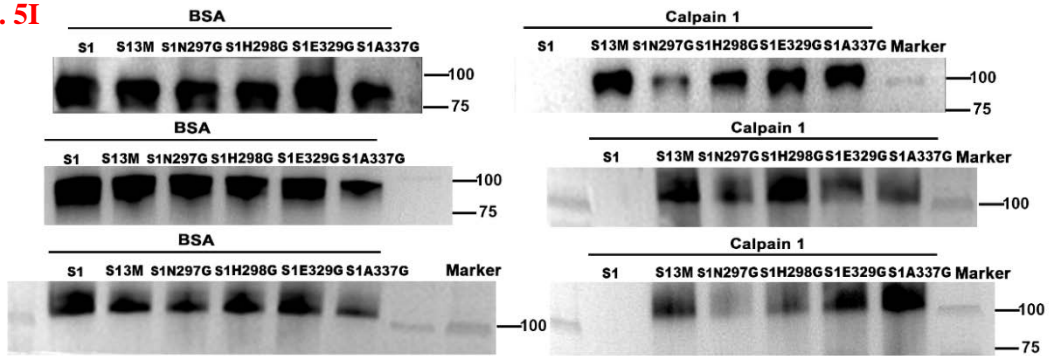

**Fig. 6A**

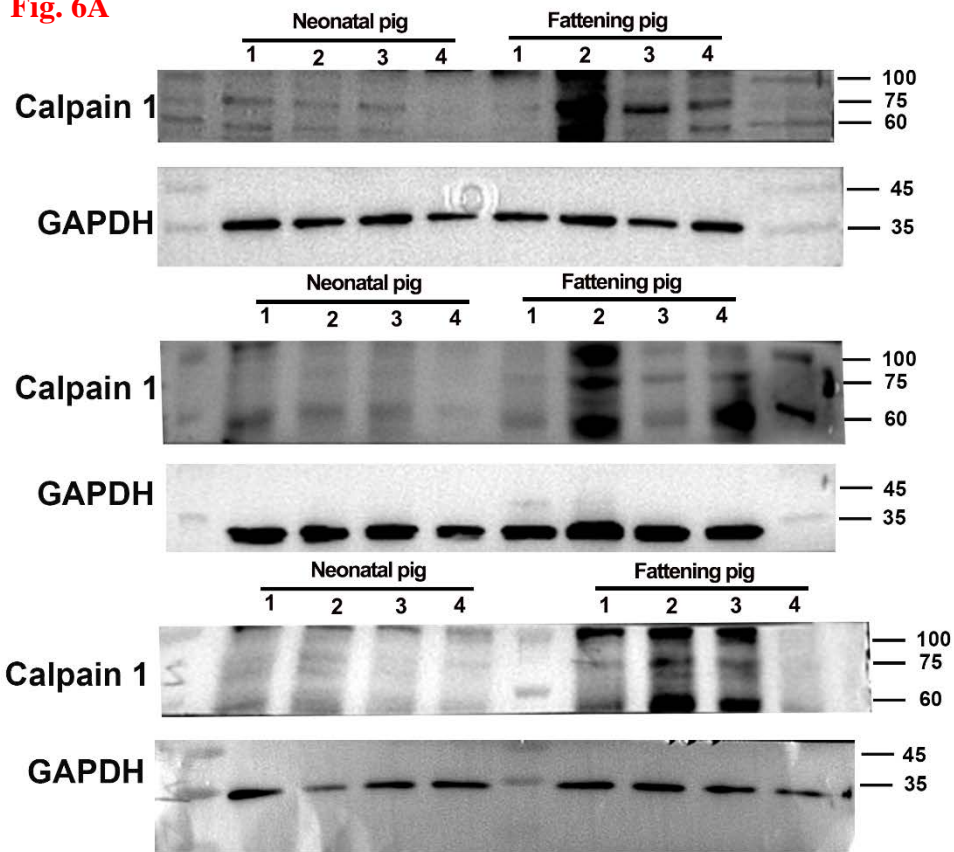

**Fig. 7B**

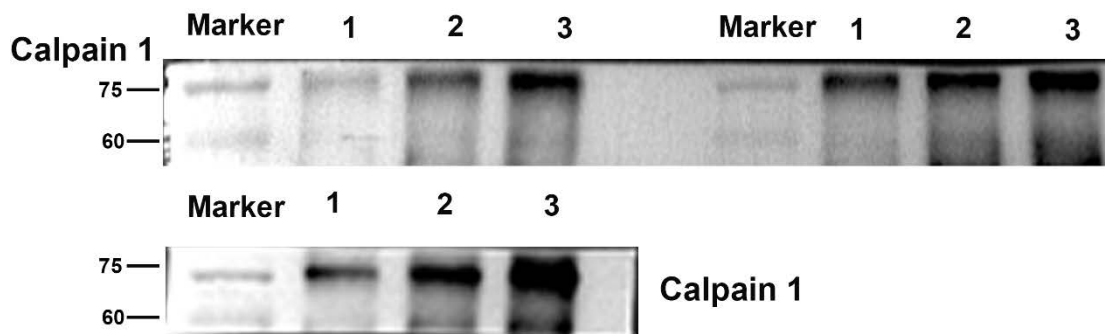

**Fig. 7E**

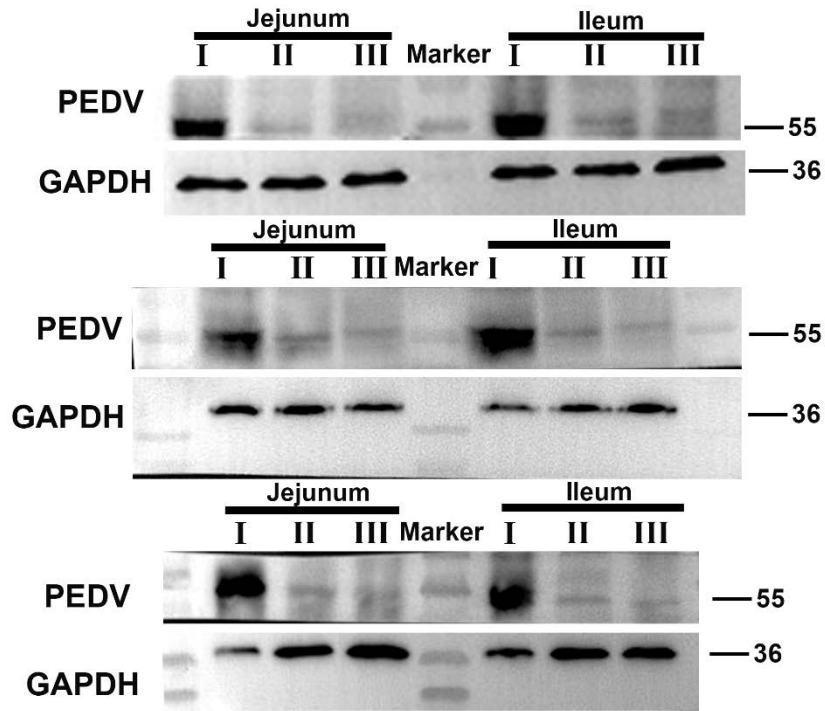

**Fig.S3C**

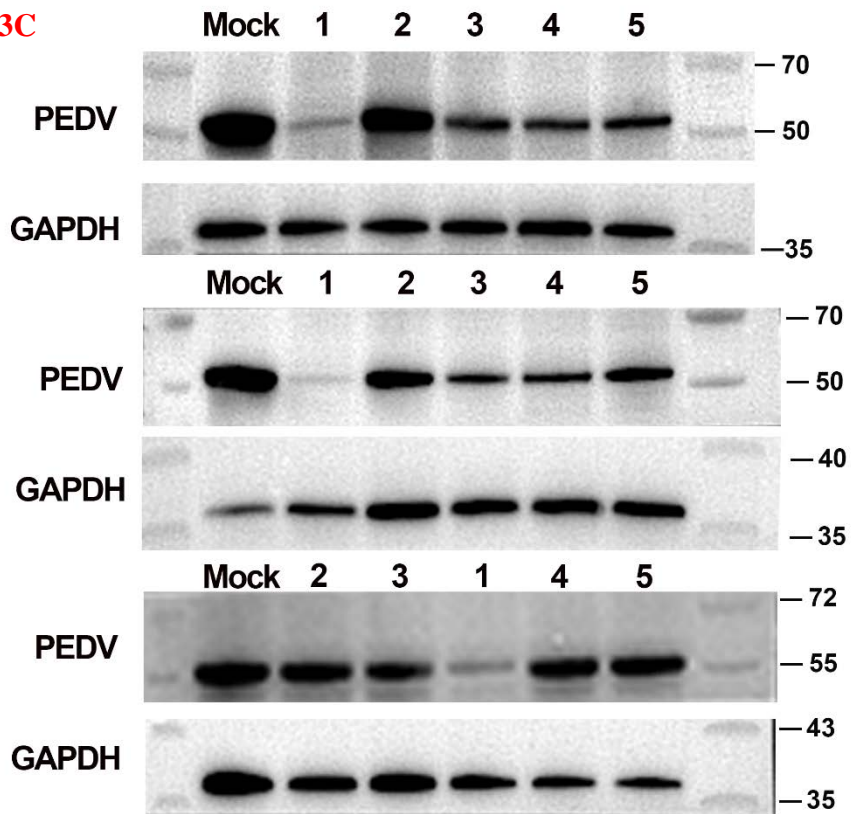

**Fig. S4A**

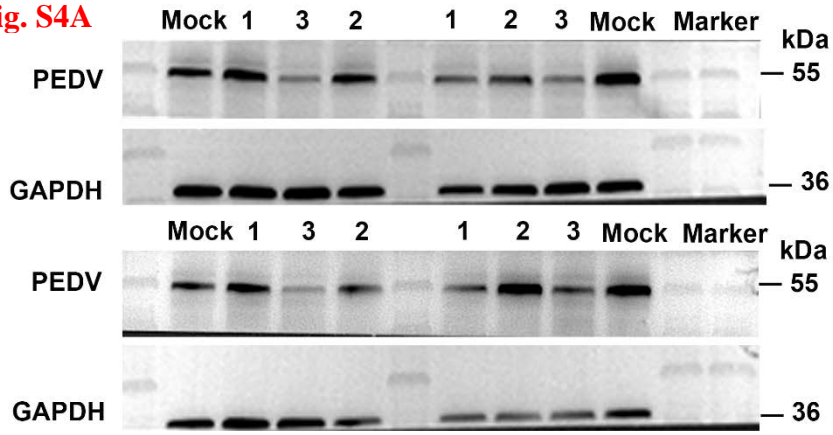

**Fig. S4C**

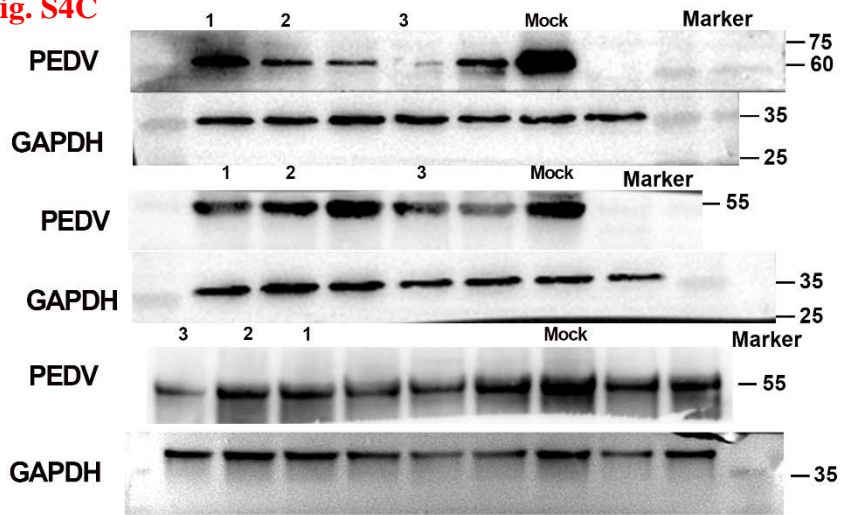

**Fig. S5C**

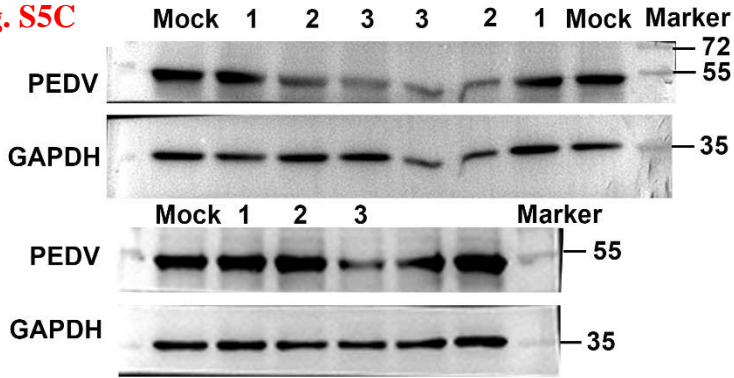

**Fig. S5D**

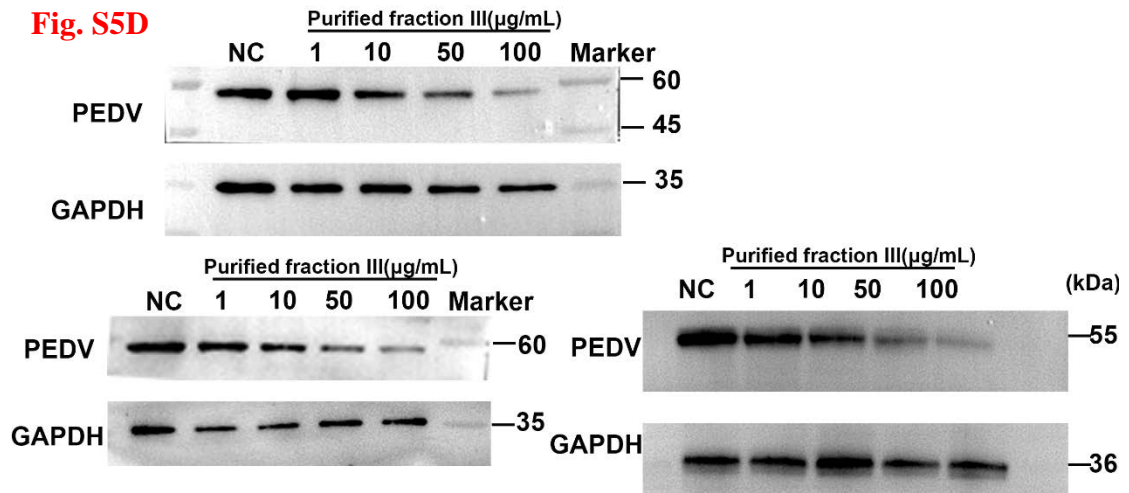

**Fig.S6A**

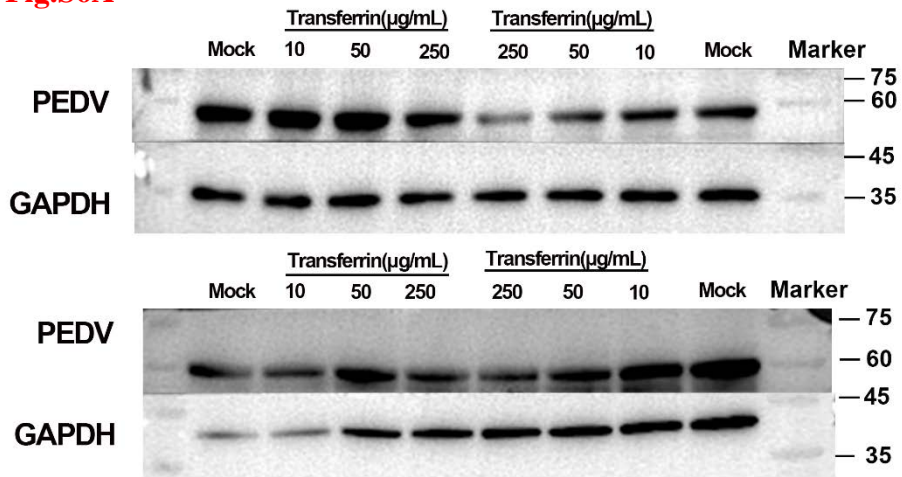

**Fig.S6D**

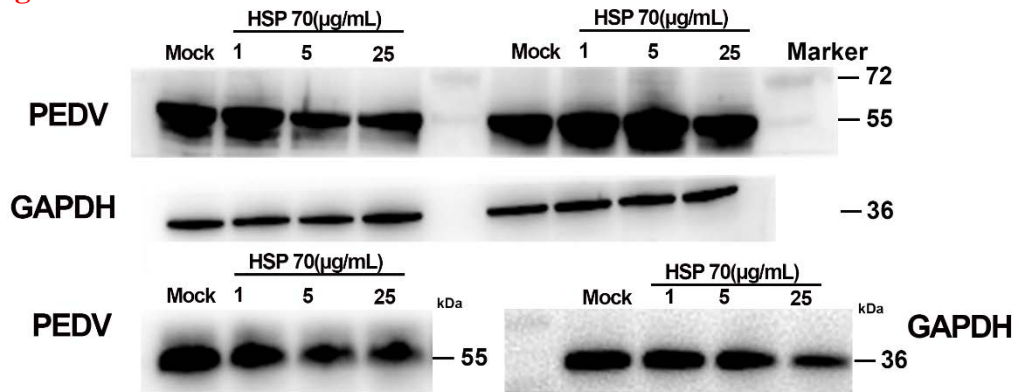

Supplement: mbio.00358-22-s0009.pdf [file mbio.00358-22-s0009.pdf]
