# Supplementary material for: Calpain-1: a Novel Antiviral Host Factor Identified in Porcine Small Intestinal Mucus
Source: mBio. 2022 Sep 14;13(5):e00358-22. doi: 10.1128/mbio.00358-22 (PMC9600339; doi:10.1128/mbio.00358-22)
Supplement: FIG S8 [file mbio.00358-22-s0008.pdf]

| Species/Abrv             | * | * | * □ * | * □ * □ * | * □ * | * | * | * | * | * | * | * | * □ * | * □ * | * | * | * | * | * | * | * □ * | * | * | * | * | * | * | * |   |   |   |   |   |   |   |   |   |   |   |
|--------------------------|---|---|-------|-----------|-------|---|---|---|---|---|---|---|-------|-------|---|---|---|---|---|---|-------|---|---|---|---|---|---|---|---|---|---|---|---|---|---|---|---|---|---|
| 1_LZC                    | F | F | S     | F         | N     | H | T | M | D | G | V | C | N     | G     | A | A | V | D | R | A | P     | E | A | L | R | F | N | I | N | D | T | S | V | I | L | A | E | G | S |
| 2_CV777                  | F | F | S     | F         | N     | H | T | M | D | G | V | C | N     | G     | A | A | V | D | R | A | P     | E | A | L | R | F | N | I | N | D | T | S | V | I | L | A | E | G | S |
| 3_DR13                   | F | F | S     | F         | N     | Q | T | M | D | G | V | C | N     | G     | A | A | V | Q | R | A | P     | E | A | L | R | F | N | I | N | D | T | S | V | I | L | A | E | G | S |
| 4_JS2008                 | F | F | S     | F         | N     | Q | T | M | D | G | V | C | N     | G     | A | A | V | Q | R | A | P     | E | A | L | R | F | N | I | N | D | T | F | V | I | L | A | E | G | S |
| 5_SD-M                   | F | F | S     | F         | N     | Q | T | M | D | G | V | C | N     | G     | A | A | V | Q | R | A | P     | E | A | L | R | F | N | I | N | D | T | F | V | I | L | A | E | G | S |
| 6_15W010_BEL_2015        | F | F | S     | F         | N     | Q | T | M | D | G | V | C | N     | G     | A | A | V | Q | R | A | P     | E | A | L | R | F | N | I | N | D | T | S | V | I | L | A | E | G | S |
| 7_FR_001_2014            | F | F | S     | F         | N     | Q | T | M | D | G | V | C | N     | G     | A | A | V | Q | R | A | P     | E | A | L | R | F | N | I | N | D | T | S | V | I | L | A | E | G | S |
| 8_MYZ-1_JPN_2013         | F | F | S     | F         | N     | Q | T | M | D | G | V | C | N     | G     | A | A | V | Q | R | A | P     | E | A | L | R | F | N | I | N | D | T | S | V | I | L | A | E | G | S |
| 9_KNU-1406-1             | F | F | S     | F         | N     | Q | T | M | D | G | V | C | N     | G     | A | A | V | Q | R | A | P     | E | A | L | R | F | N | I | N | D | T | S | V | I | L | A | E | G | S |
| 10_OH851                 | F | F | S     | F         | N     | Q | T | M | D | G | V | C | N     | G     | A | A | V | Q | R | A | P     | E | A | L | R | F | N | I | N | D | T | S | V | I | L | A | E | G | S |
| 11_MEX_124_2014          | F | F | S     | F         | N     | Q | T | I | D | G | V | C | N     | G     | A | A | V | Q | R | A | P     | E | A | L | R | F | N | I | N | D | T | S | V | I | L | A | E | G | S |
| 12_KNU-1401              | F | F | S     | F         | N     | Q | T | I | D | G | V | C | N     | G     | A | A | V | H | R | A | P     | E | A | L | R | F | N | I | N | D | T | S | V | I | L | A | E | G | S |
| 13_OH1414                | F | F | S     | F         | N     | Q | T | I | D | G | V | C | N     | G     | A | A | V | Q | R | A | P     | E | A | L | R | F | N | I | N | D | T | S | V | I | L | A | E | G | S |
| 14_USA_indiana_17846_201 | F | F | S     | F         | N     | Q | T | I | D | G | V | C | N     | G     | A | A | V | Q | R | A | P     | E | A | L | R | F | N | I | N | D | T | S | V | I | L | A | E | G | S |
| 15_USA_Kansas29_2013     | F | F | S     | F         | N     | Q | T | I | D | G | V | C | N     | G     | A | A | V | Q | R | A | P     | E | A | L | R | F | N | I | N | D | T | S | V | I | L | A | E | G | S |
| 16_USA_Colorado_2013     | F | F | S     | F         | N     | Q | T | I | D | G | V | C | N     | G     | A | A | V | Q | R | A | P     | E | A | L | R | F | N | I | N | D | T | S | V | I | L | A | E | G | S |
| 17_CH_ZMDZY_11           | F | F | S     | F         | N     | Q | T | I | D | G | V | C | N     | G     | A | A | V | Q | R | A | P     | E | A | L | R | F | N | I | N | D | T | S | V | I | L | A | E | G | S |
| 18_CH_YNKM-8_2013        | F | F | S     | F         | N     | Q | T | I | D | G | V | C | N     | G     | A | A | V | Q | R | A | P     | E | A | L | R | F | N | I | N | D | T | S | V | I | L | A | E | G | S |
| 19_JSCZ1601              | F | F | S     | F         | N     | Q |   |   |   |   |   |   |       |       |   |   |   |   |   |   |       |   |   |   |   |   |   |   |   |   |   |   |   |   |   |   |   |   |   |

|            |    | Percent Identity |       |      |      |      |       |       |       |       |       |      |      |       |       |       |       |       |       |       |       |       |      |      |                        |                   |
|------------|----|------------------|-------|------|------|------|-------|-------|-------|-------|-------|------|------|-------|-------|-------|-------|-------|-------|-------|-------|-------|------|------|------------------------|-------------------|
|            | 1  | 2                | 3     | 4    | 5    | 6    | 7     | 8     | 9     | 10    | 11    | 12   | 13   | 14    | 15    | 16    | 17    | 18    | 19    | 20    | 21    | 22    | 23   |      |                        |                   |
| Divergence | 1  | █                | 100.0 | 92.5 | 92.5 | 90.0 | 92.5  | 92.5  | 92.5  | 92.5  | 92.5  | 92.5 | 92.5 | 92.5  | 92.5  | 92.5  | 92.5  | 92.5  | 92.5  | 92.5  | 92.5  | 92.5  | 92.5 | 1    | LZC                    |                   |
|            | 2  | 0.0              | █     | 92.5 | 92.5 | 90.0 | 92.5  | 92.5  | 92.5  | 92.5  | 92.5  | 92.5 | 92.5 | 92.5  | 92.5  | 92.5  | 92.5  | 92.5  | 92.5  | 92.5  | 92.5  | 92.5  | 92.5 | 2    | CV777                  |                   |
|            | 3  | 7.9              | 7.9   | █    | 95.0 | 97.5 | 100.0 | 100.0 | 100.0 | 100.0 | 95.0  | 92.5 | 95.0 | 95.0  | 95.0  | 95.0  | 95.0  | 95.0  | 100.0 | 95.0  | 95.0  | 92.5  | 92.5 | 3    | DR13                   |                   |
|            | 4  | 7.9              | 7.9   | 5.2  | █    | 97.5 | 95.0  | 95.0  | 95.0  | 95.0  | 95.0  | 92.5 | 95.0 | 95.0  | 95.0  | 95.0  | 95.0  | 95.0  | 95.0  | 95.0  | 95.0  | 92.5  | 92.5 | 4    | JS2008                 |                   |
|            | 5  | 10.8             | 10.8  | 2.5  | 2.5  | █    | 97.5  | 97.5  | 97.5  | 97.5  | 97.5  | 92.5 | 92.5 | 92.5  | 92.5  | 92.5  | 92.5  | 92.5  | 92.5  | 92.5  | 90.0  | 90.0  | 5    | SD-M |                        |                   |
|            | 6  | 7.9              | 7.9   | 0.0  | 5.2  | 2.5  | █     | 100.0 | 100.0 | 100.0 | 100.0 | 95.0 | 92.5 | 95.0  | 95.0  | 95.0  | 95.0  | 95.0  | 100.0 | 95.0  | 95.0  | 92.5  | 92.5 | 6    | 15V010_BEL_2015        |                   |
|            | 7  | 7.9              | 7.9   | 0.0  | 5.2  | 2.5  | 0.0   | █     | 100.0 | 100.0 | 100.0 | 95.0 | 92.5 | 95.0  | 95.0  | 95.0  | 95.0  | 95.0  | 95.0  | 100.0 | 95.0  | 92.5  | 92.5 | 7    | FR_001_2014            |                   |
|            | 8  | 7.9              | 7.9   | 0.0  | 5.2  | 2.5  | 0.0   | 0.0   | █     | 100.0 | 100.0 | 95.0 | 92.5 | 95.0  | 95.0  | 95.0  | 95.0  | 95.0  | 95.0  | 100.0 | 95.0  | 92.5  | 92.5 | 8    | MYZ-1_JPN_2013         |                   |
|            | 9  | 7.9              | 7.9   | 0.0  | 5.2  | 2.5  | 0.0   | 0.0   | 0.0   | █     | 100.0 | 95.0 | 92.5 | 95.0  | 95.0  | 95.0  | 95.0  | 95.0  | 95.0  | 100.0 | 95.0  | 92.5  | 92.5 | 9    | KNU-1406-1             |                   |
|            | 10 | 7.9              | 7.9   | 0.0  | 5.2  | 2.5  | 0.0   | 0.0   | 0.0   | 0.0   | █     | 95.0 | 92.5 | 95.0  | 95.0  | 95.0  | 95.0  | 95.0  | 95.0  | 100.0 | 95.0  | 92.5  | 92.5 | 10   | OH851                  |                   |
|            | 11 | 7.9              | 7.9   | 5.2  | 5.2  | 7.9  | 5.2   | 5.2   | 5.2   | 5.2   | 5.2   | █    | 97.5 | 100.0 | 100.0 | 100.0 | 100.0 | 100.0 | 95.0  | 100.0 | 95.0  | 97.5  | 97.5 | 11   | MEX_124_2014           |                   |
|            | 12 | 7.9              | 7.9   | 7.9  | 7.9  | 10.8 | 7.9   | 7.9   | 7.9   | 7.9   | 7.9   | 2.5  | █    | 97.5  | 97.5  | 97.5  | 97.5  | 97.5  | 97.5  | 92.5  | 97.5  | 97.5  | 97.5 | 12   | KNU-1401               |                   |
|            | 13 | 7.9              | 7.9   | 5.2  | 5.2  | 7.9  | 5.2   | 5.2   | 5.2   | 5.2   | 5.2   | 0.0  | 2.5  | █     | 100.0 | 100.0 | 100.0 | 100.0 | 95.0  | 100.0 | 100.0 | 97.5  | 97.5 | 13   | OH1414                 |                   |
|            | 14 | 7.9              | 7.9   | 5.2  | 5.2  | 7.9  | 5.2   | 5.2   | 5.2   | 5.2   | 5.2   | 0.0  | 2.5  | 0.0   | █     | 100.0 | 100.0 | 100.0 | 95.0  | 100.0 | 100.0 | 97.5  | 97.5 | 14   | USA_Indiana_17846_2013 |                   |
|            | 15 | 7.9              | 7.9   | 5.2  | 5.2  | 7.9  | 5.2   | 5.2   | 5.2   | 5.2   | 5.2   | 0.0  | 2.5  | 0.0   | 0.0   | █     | 100.0 | 100.0 | 95.0  | 100.0 | 100.0 | 97.5  | 97.5 | 15   | USA_Kansas29_2013      |                   |
|            | 16 | 7.9              | 7.9   | 5.2  | 5.2  | 7.9  | 5.2   | 5.2   | 5.2   | 5.2   | 5.2   | 0.0  | 2.5  | 0.0   | 0.0   | 0.0   | █     | 100.0 | 100.0 | 95.0  | 100.0 | 100.0 | 97.5 | 97.5 | 16                     | USA_Colorado_2013 |
|            | 17 | 7.9              | 7.9   | 5.2  | 5.2  | 7.9  | 5.2   | 5.2   | 5.2   | 5.2   | 5.2   | 0.0  | 2.5  | 0.0   | 0.0   | 0.0   | 0.0   | █     | 100.0 | 95.0  | 100.0 | 100.0 | 97.5 | 97.5 | 17                     | CH_ZMDZY_11       |
|            | 18 | 7.9              | 7.9   | 5.2  | 5.2  | 7.9  | 5.2   | 5.2   | 5.2   | 5.2   | 5.2   | 0.0  | 2.5  | 0.0   | 0.0   | 0.0   | 0.0   | 0.0   | █     |       |       |       |      |      |                        |                   |

Box plot showing Calpain-1 levels (µg/mL) in Neonatal pig and Weaning pig groups. The y-axis represents Calpain-1 (µg/mL) from 0 to 10. The x-axis shows two groups: Neonatal pig and Weaning pig. The Neonatal pig group has a median around 1.0 µg/mL, while the Weaning pig group has a median around 4.2 µg/mL. A significant difference is indicated by \*\*.

| Group        | Min | Q1  | Median | Q3  | Max | Outliers                     |
|--------------|-----|-----|--------|-----|-----|------------------------------|
| Neonatal pig | 0.7 | 0.8 | 1.0    | 1.2 | 1.6 | 1.5, 1.4, 1.1, 0.9, 0.8, 0.7 |
| Weaning pig  | 3.9 | 4.1 | 4.2    | 6.0 | 6.1 | 5.4, 4.1, 4.0, 3.9           |

The box plot displays Calpain-1 levels (µg/mL) for two groups: Weaning pig and Sucking pig. The y-axis ranges from 0 to 15 µg/mL. The x-axis shows treatments: Buffer control, 1mg/kg, and 2.5mg/kg for Weaning pig; and Buffer control, 1mg/kg, 2.5mg/kg, and 4mg/kg for Sucking pig. Statistical significance is indicated by asterisks (\*, \*\*) and 'ns' for non-significant.

| Group       | Treatment      | Median (µg/mL) | Q1 (µg/mL) | Q3 (µg/mL) | Min (µg/mL) | Max (µg/mL) |
|-------------|----------------|----------------|------------|------------|-------------|-------------|
| Weaning pig | Buffer control | ~4.2           | ~3.8       | ~4.8       | ~3.5        | ~5.2        |
|             | 1mg/kg         | ~2.5           | ~2.2       | ~2.8       | ~2.0        | ~3.2        |
|             | 2.5mg/kg       | ~4.5           | ~3.8       | ~5.0       | ~3.5        | ~5.5        |
| Sucking pig | Buffer control | ~10.0          | ~8.0       | ~12.0      | ~7.5        | ~13.0       |
|             | 1mg/kg         | ~2.5           | ~2.2       | ~2.8       | ~2.0        | ~3.2        |
|             | 2.5mg/kg       | ~4.5           | ~3.8       | ~5.0       | ~3.5        | ~5.5        |
|             | 4mg/kg         | ~10.0          | ~8.0       | ~12.0      | ~7.5        | ~13.0       |

Statistical significance markers: \*\* (p < 0.01), \* (p < 0.05), ns (not significant).
