# Supplementary material for: Calpain-1: a Novel Antiviral Host Factor Identified in Porcine Small Intestinal Mucus
Source: PubMed Central journal article supplement (PMC9600339; doi:10.1128/mbio.00358-22), 2022-09-14

**A****Newborn**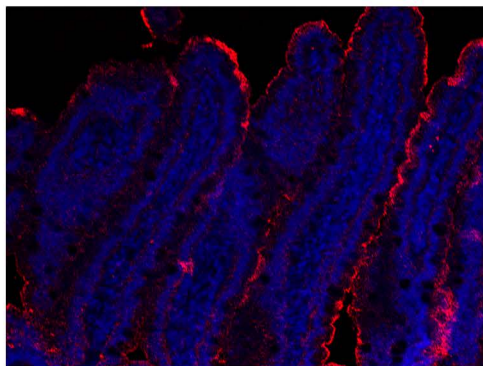**Weaning**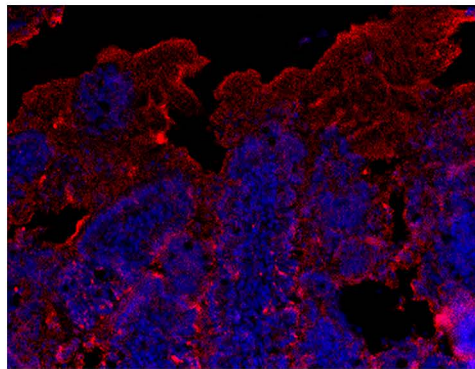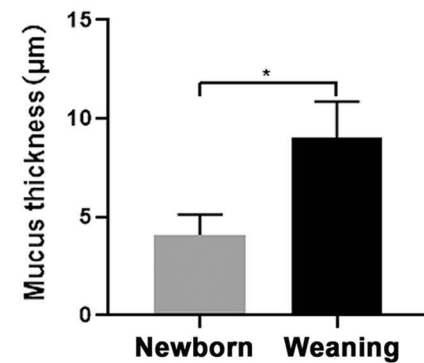**B**Relative MUC1 mRNA  
Expression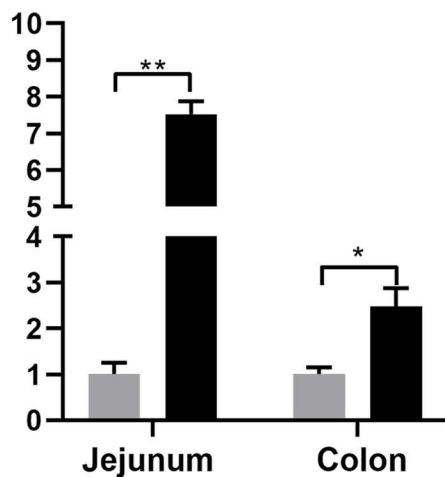**C**Relative MUC2 mRNA  
Expression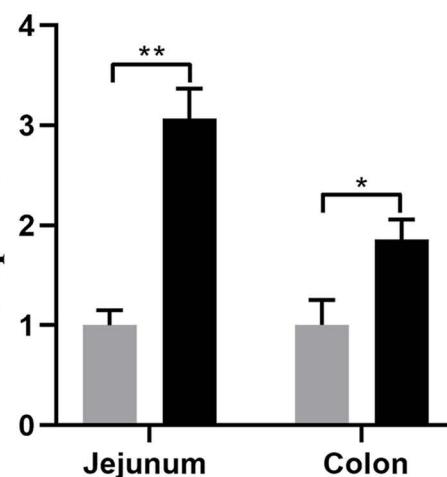**D**Relative MUC4 mRNA  
Expression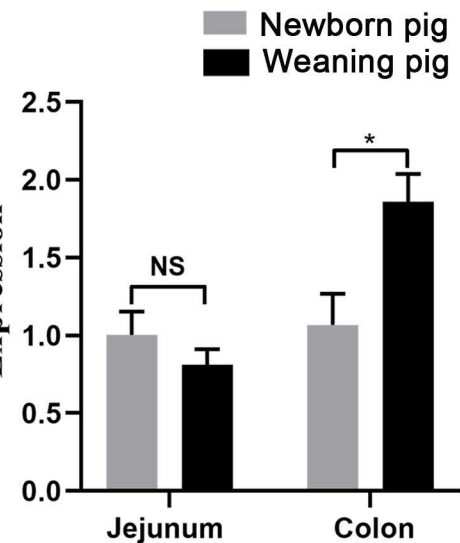**E**Relative Retnlb mRNA  
Expression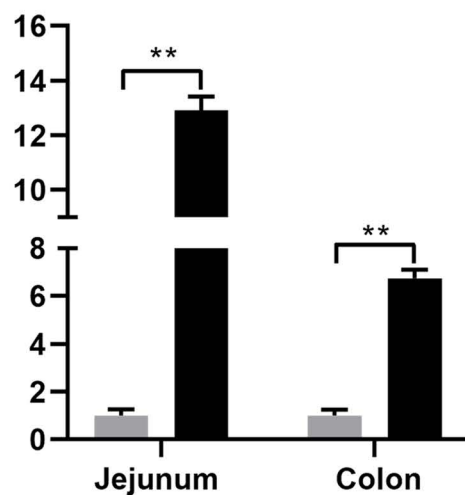**F**Relative TFF1 mRNA  
Expression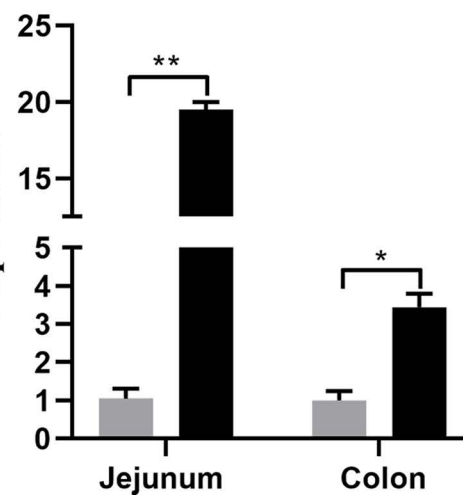

Supplement: mbio.00358-22-s0001.pdf [file mbio.00358-22-s0001.pdf]
