# Supplementary material for: Calpain-1: a Novel Antiviral Host Factor Identified in Porcine Small Intestinal Mucus
Source: PubMed Central journal article supplement (PMC9600339; doi:10.1128/mbio.00358-22), 2022-09-14

**A****Jejunum**

0 day pig

7 days pig

30 days pig

60 days pig

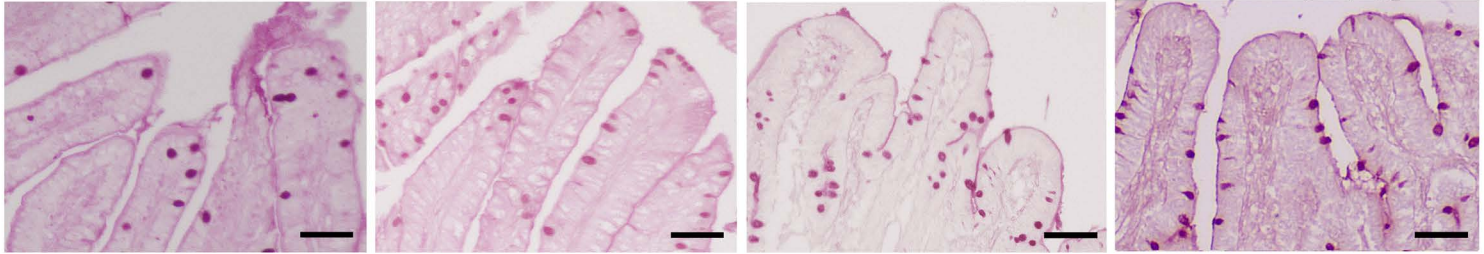**Ileum**

0 day pig

7 days pig

30 days pig

60 days pig

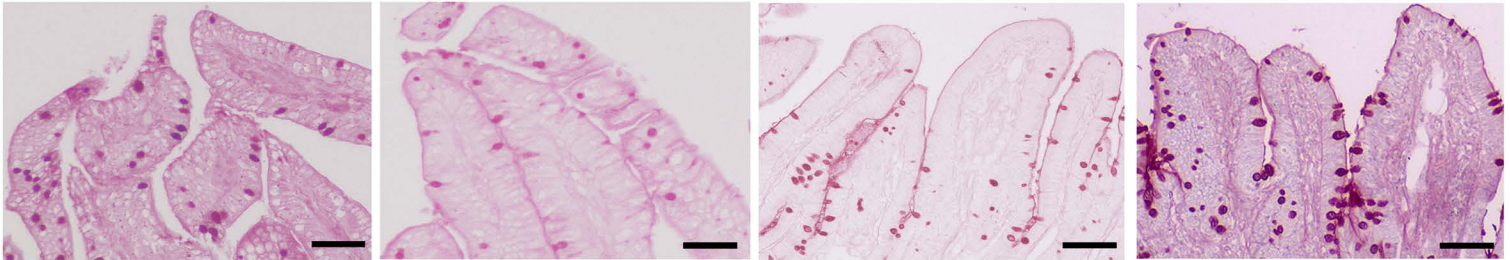**B**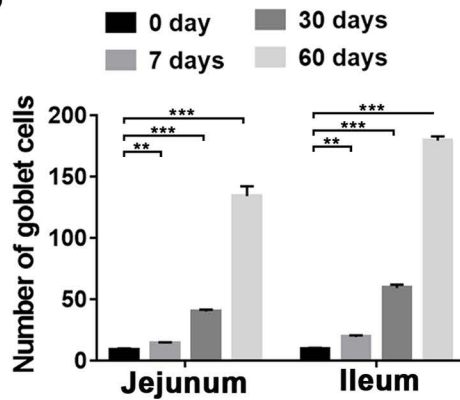**C****Small intestine**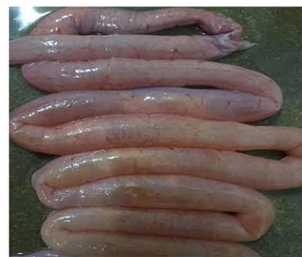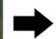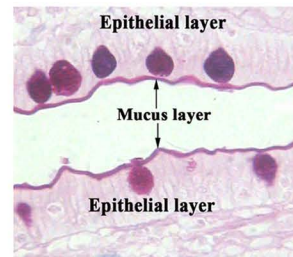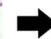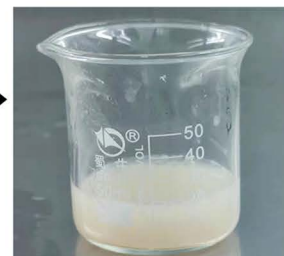

Supplement: mbio.00358-22-s0002.pdf [file mbio.00358-22-s0002.pdf]
