# Supplementary material for: Calpain-1: a Novel Antiviral Host Factor Identified in Porcine Small Intestinal Mucus
Source: PubMed Central journal article supplement (PMC9600339; doi:10.1128/mbio.00358-22), 2022-09-14

**A**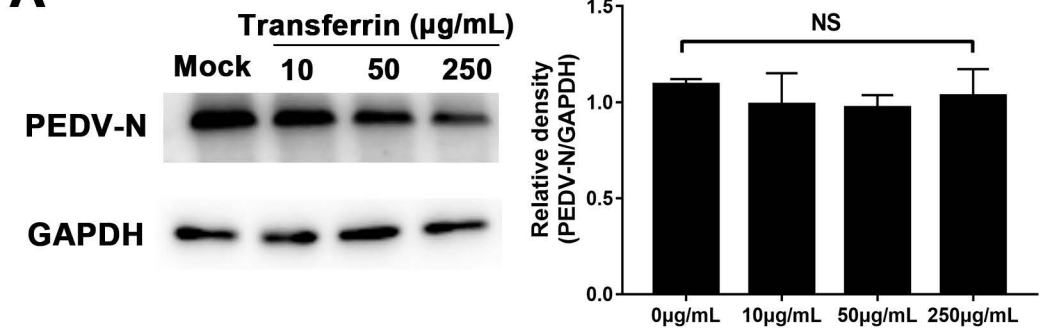**B**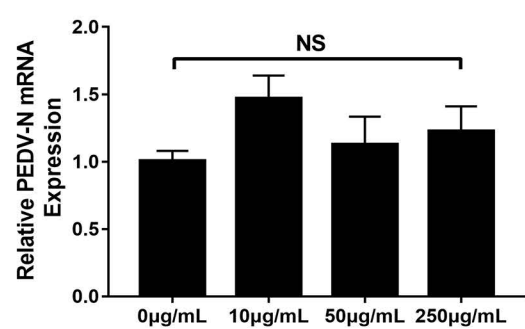**C**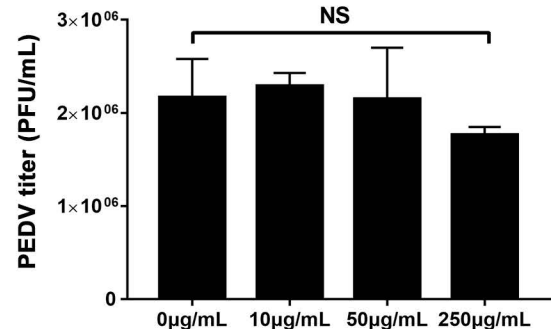**D**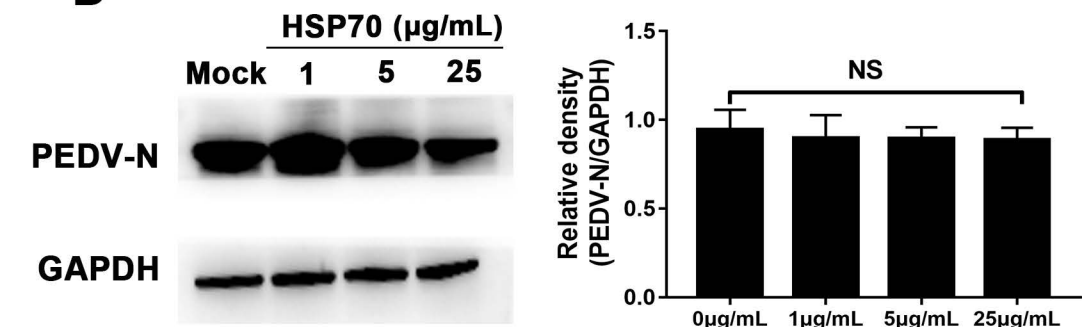**E**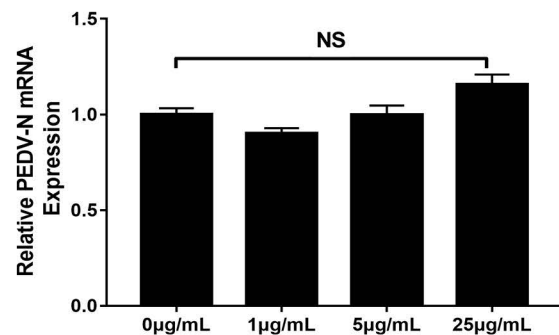**F**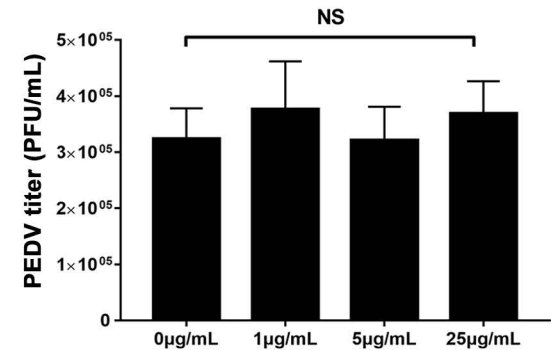**G**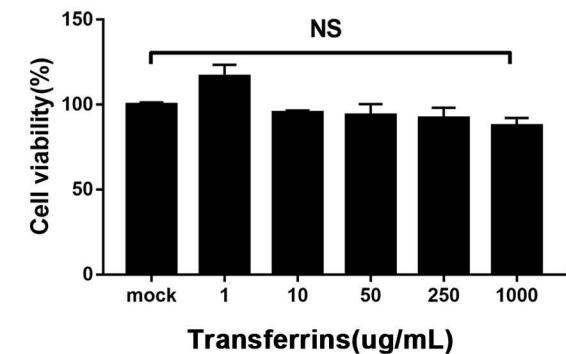**H**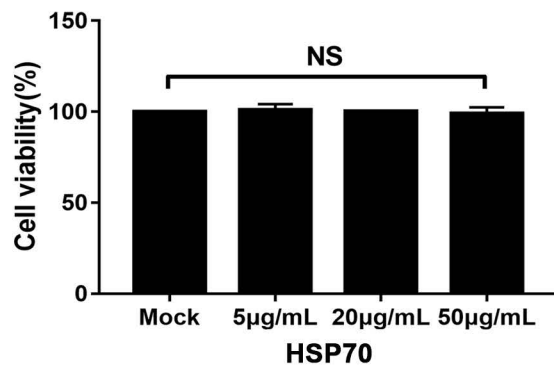**I**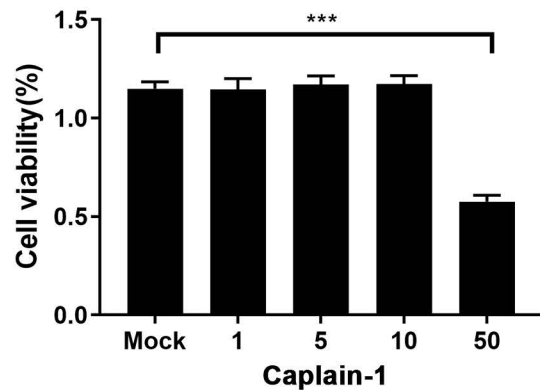**J**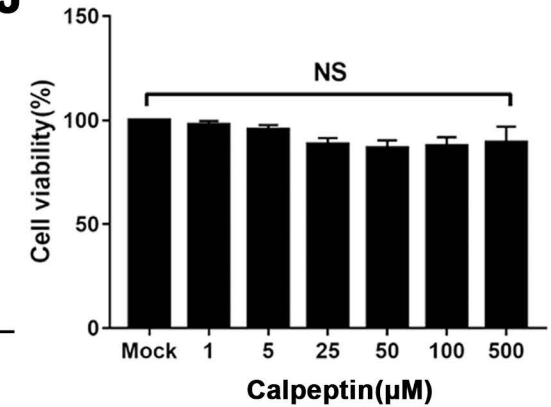

Supplement: mbio.00358-22-s0006.pdf [file mbio.00358-22-s0006.pdf]
